# Supplementary material
Source: publisher figshare collection journal article supplement (https://future-science-group.figshare.com/ndownloader/files/28351152)
Supplement: Supplementary file 1 [file 28351152]

## CBD Use Questionnaire [Anonymous]

Today's Date: \_\_\_\_\_

Year of Surgery: \_\_\_\_\_

Site of Surgery:

☐

Right Knee

☐

Left Knee

☐

Right Hip

☐

Left Hip

1. Have you taken CBD (cannabidiol) for pain control for hip or knee pain?

☐

Yes

☐

No

*If 'no' -> please skip to the next page*

2. When did you take CBD?

☐

Before

☐

After

☐

Both before and after surgery

3. Why did you first take CBD? [check all that apply]

\_\_\_\_\_ pain

\_\_\_\_\_ mood/anxiety

\_\_\_\_\_ sleep

\_\_\_\_\_ overall well-being

4. In what form did you try CBD? [check all that apply]

\_\_\_\_\_ pill/tablet

\_\_\_\_\_ oil

\_\_\_\_\_ cream

\_\_\_\_\_ bath salts

\_\_\_\_\_ gummy

\_\_\_\_\_ Other [please describe via free text if 'other']

5. In a typical week, how many times did you take CBD?

\_\_\_ 0 to 1

\_\_\_ 2-5

\_\_\_ 6-10

\_\_\_ 11-20

\_\_\_ >21-30

\_\_\_ >30

6. Where did you first hear about CBD?

\_\_\_\_\_ friend or relative

\_\_\_\_\_ online advertisement

\_\_\_\_\_ store display

\_\_\_\_\_ doctor

\_\_\_\_\_ Other [please describe via free text if 'other']

7. How did you purchase CBD? [check all that apply]

\_\_\_\_\_ medical prescription

\_\_\_\_\_ online store

\_\_\_\_\_ physical store

\_\_\_\_\_ other [free text]

8. What were *beneficial* effects you found from using CBD?

\_\_\_\_\_ pain relief

\_\_\_\_\_ reduce anxiety/improve mood

\_\_\_\_\_ improve sleep

\_\_\_\_\_ reduce nausea

\_\_\_\_\_ Other [free text if 'other']

9. What *side effects* did you experience from using CBD?

\_\_\_\_\_ fatigue

\_\_\_\_\_ appetite changes

\_\_\_\_\_ diarrhea

\_\_\_\_\_ constipation

\_\_\_\_\_ nausea

\_\_\_\_\_ agitation

\_\_\_\_\_ Other [free text if 'other']

10. Would you recommend CBD for pain control to a friend?

☐

Yes

☐

No

11. Please list your age, height and weight below:

Age: \_\_\_\_\_ years

Height: \_\_\_\_\_ feet \_\_\_\_\_ inches

Weight: \_\_\_\_\_ pounds

12. How would you describe yourself?

\_\_\_\_\_ American Indian or Alaska Native

\_\_\_\_\_ Black or African American

\_\_\_\_\_ Asian

\_\_\_\_\_ Native Hawaiian or Other Pacific Islander

\_\_\_\_\_ White

\_\_\_\_\_ Other [Free Text]

13. Do you identify as male or female?

\_\_\_\_\_ male

\_\_\_\_\_ female

\_\_\_\_\_ other [free text]

14. In which state do you reside?

\_\_\_\_\_ New York

\_\_\_\_\_ New Jersey

\_\_\_\_\_ Connecticut

\_\_\_\_\_ Other [Free Text]

15. Please check the phrase that indicates how satisfied you have been with pain control after your surgery

\_\_\_\_\_ very satisfied

\_\_\_\_\_ satisfied

\_\_\_\_\_ slightly satisfied

\_\_\_\_\_ slightly dissatisfied

\_\_\_\_\_ dissatisfied

\_\_\_\_\_ very dissatisfied

16. Were you taking opioids (e.g. oxycodone, hydrocodone, tramadol, etc.) prior to surgery?

☐

Yes

☐

No

If 'yes', for how long? \_\_\_\_\_ (e.g. '2 months')

17. Are you currently taking opioids for pain control?

☐

Yes

☐

No

If 'no', how many months, weeks, and/or days after surgery did you stop taking opioids?

\_\_\_\_\_ months \_\_\_\_\_ weeks \_\_\_\_\_ days

18. What opioid were you prescribed post-surgery?

\_\_\_\_\_ Tramadol

\_\_\_\_\_ Dilaudid [hydromorphone]

\_\_\_\_\_ Percocet [oxycodone-acetaminophen]

\_\_\_\_\_ Norco [hydrocodone-acetaminophen]

\_\_\_\_\_ Oxycodone

\_\_\_\_\_ Other [Free Text]

19. Did you require refills of your opioid prescription after surgery?

☐

Yes

☐

No

If yes, how many refills? \_\_\_\_\_

20. What types of *side effects* did you experience from opioids after surgery? [free text]

\_\_\_\_\_ fatigue

\_\_\_\_\_ appetite changes

\_\_\_\_\_ diarrhea

\_\_\_\_\_ constipation

\_\_\_\_\_ nausea

\_\_\_\_\_ confusion

\_\_\_\_\_ sweating

\_\_\_\_\_ itchiness

\_\_\_\_\_ urinary retention

\_\_\_\_\_ Other [free text if 'other']
